# Supplementary material
Source: PubMed Central journal article supplement (PMC6731174)
Supplement: mmc1.pdf [file mmc1.pdf]

**Supplemental Information**

**circRNA\_0025202 Regulates Tamoxifen Sensitivity  
and Tumor Progression via Regulating  
the miR-182-5p/FOXO3a Axis in Breast Cancer**

**Yuting Sang, Bing Chen, Xiaojin Song, Yaming Li, Yiran Liang, Dianwen Han, Ning Zhang, Hanwen Zhang, Ying Liu, Tong Chen, Chen Li, Lijuan Wang, Wenjing Zhao, and Qifeng Yang**

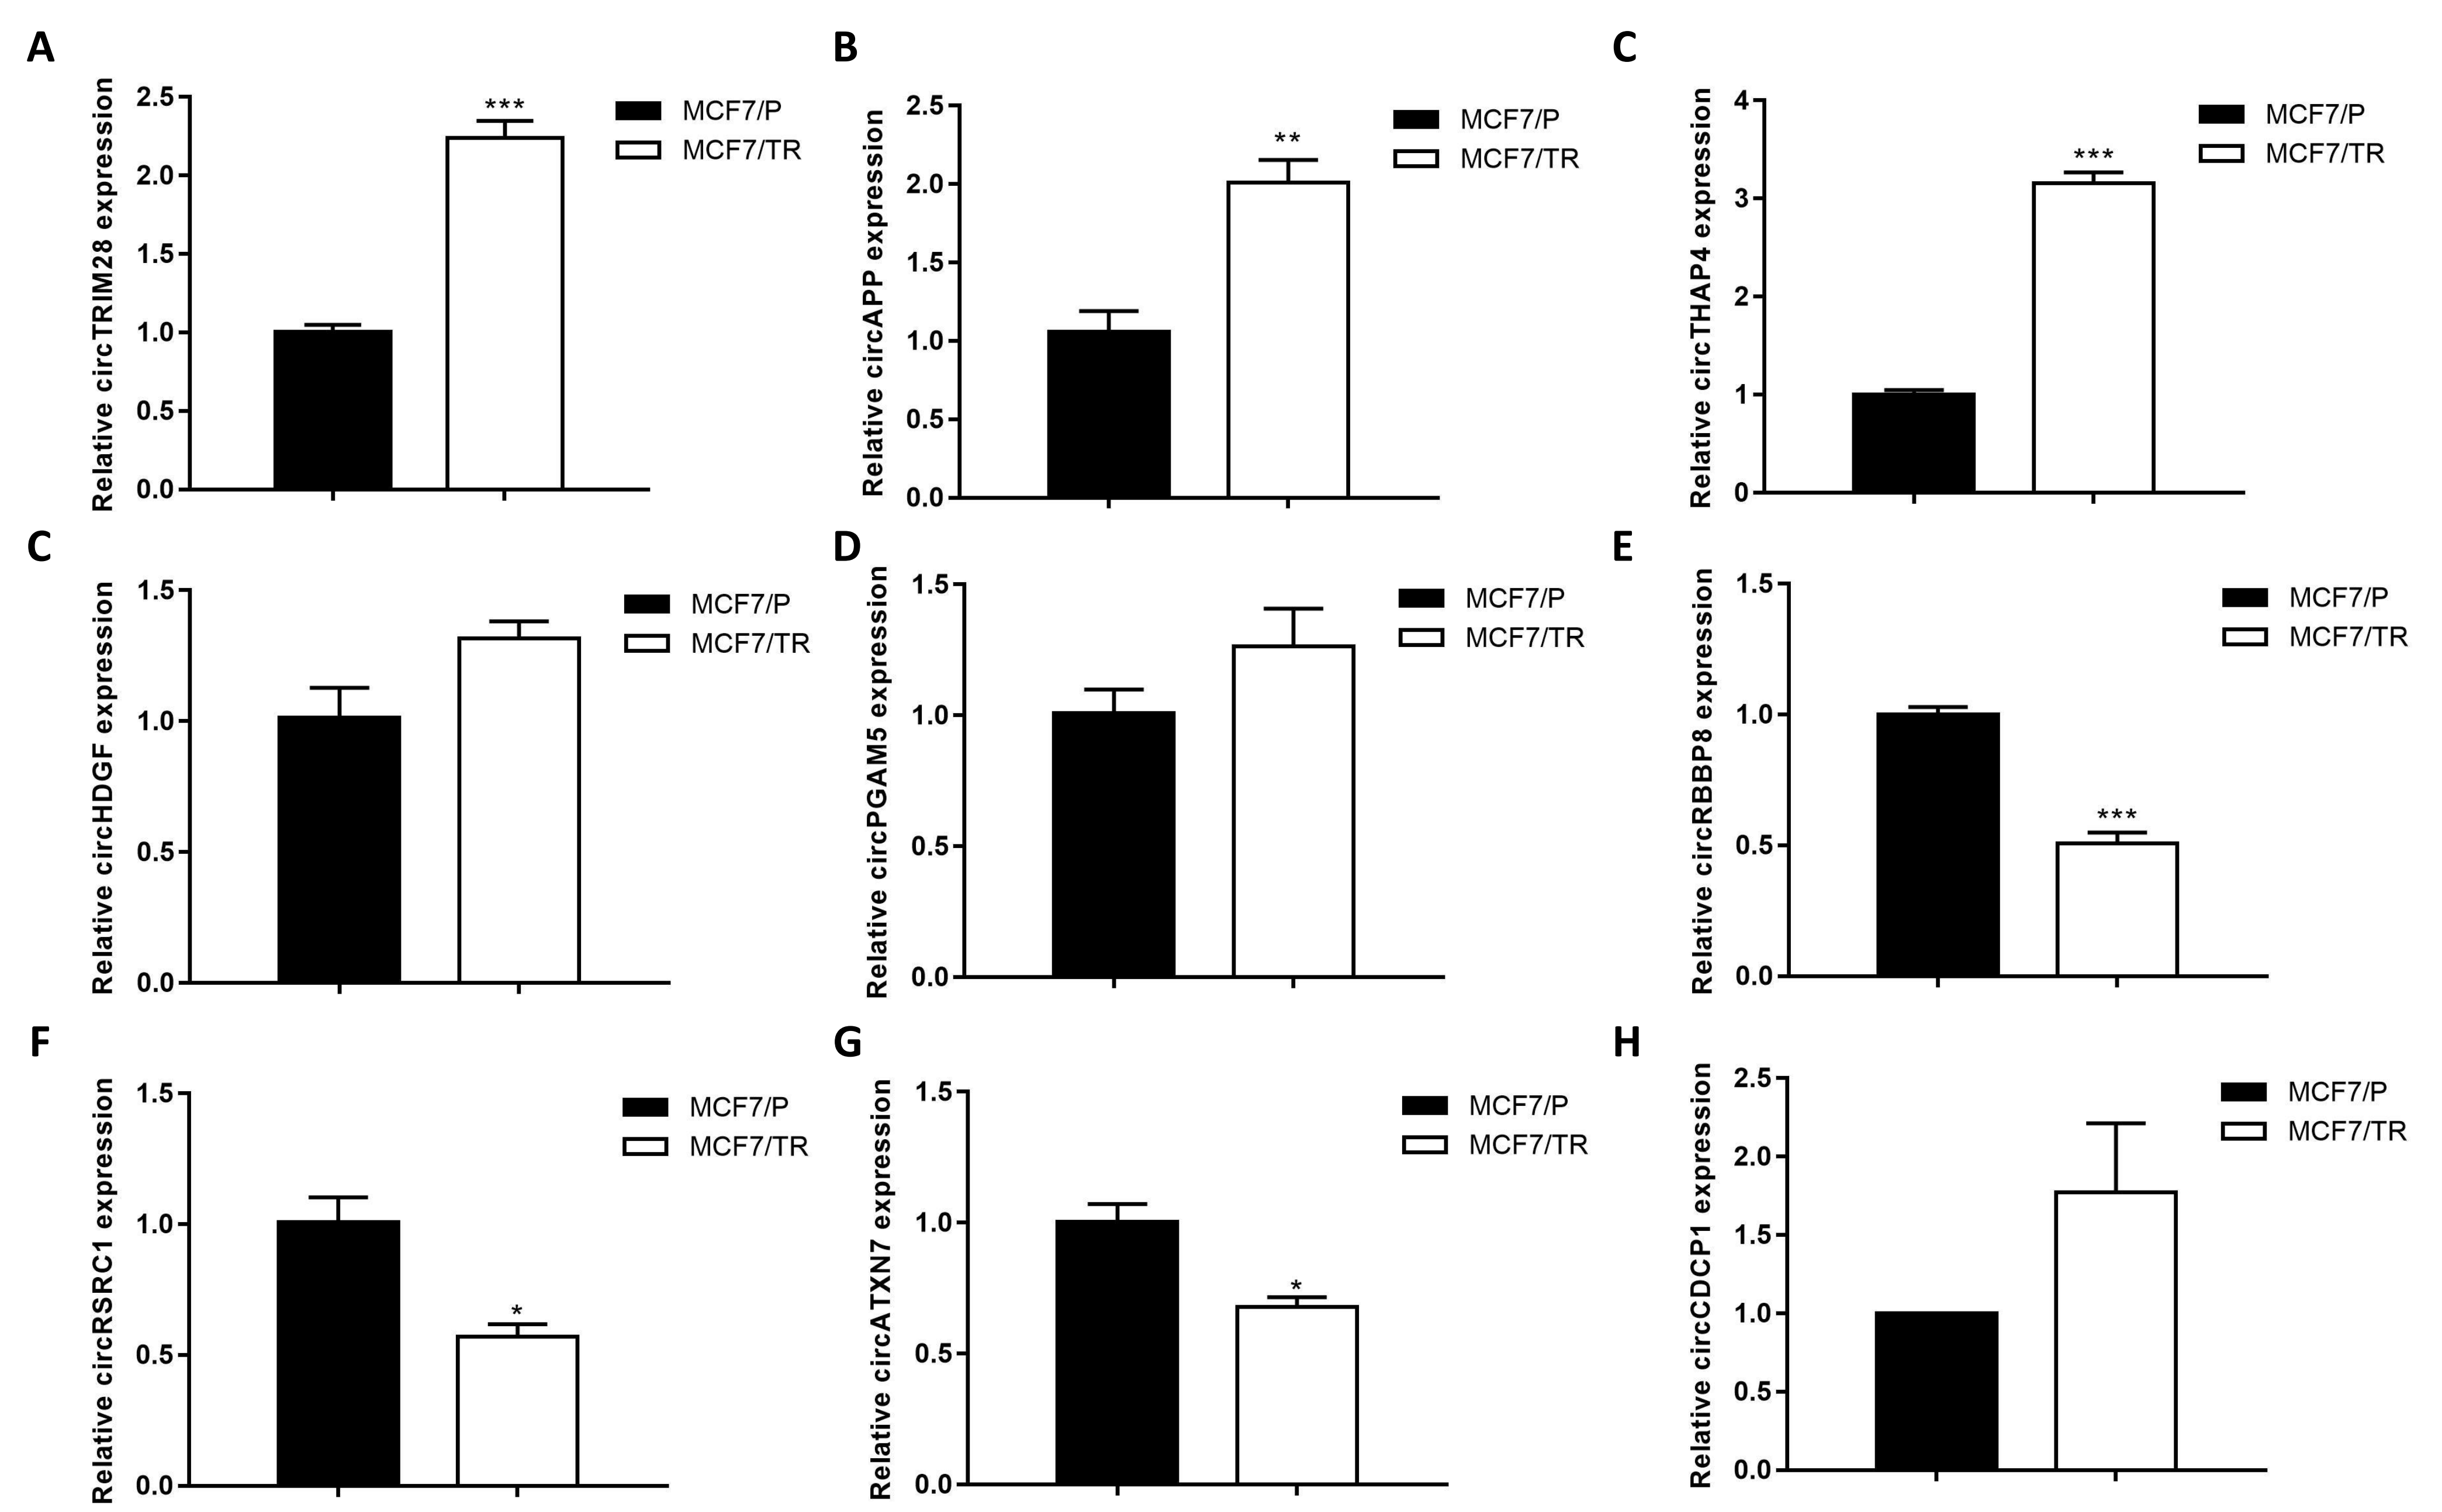

**I**

|                         |                                                                         |         |                                  |                                   |                                        |                                        |
|-------------------------|-------------------------------------------------------------------------|---------|----------------------------------|-----------------------------------|----------------------------------------|----------------------------------------|
| ID                      | hsa_circ_0025202                                                        |         |                                  |                                   |                                        |                                        |
| Position                | chr12:6646474-6647162                                                   |         |                                  |                                   |                                        |                                        |
| Strand                  | +                                                                       |         |                                  |                                   |                                        |                                        |
| Genomic length          | 688                                                                     |         |                                  |                                   |                                        |                                        |
| Spliced sequence length | 495                                                                     |         |                                  |                                   |                                        |                                        |
| Annotation              | ANNOTATED<br>CDS<br>coding<br>INTERNAL<br>OVCODE<br>OVERLAPTX<br>OVEXON |         |                                  |                                   |                                        |                                        |
| Repeats                 | NA                                                                      |         |                                  |                                   |                                        |                                        |
| Best transcript         | NM_002046                                                               |         |                                  |                                   |                                        |                                        |
| Gene symbol             | GAPDH                                                                   |         |                                  |                                   |                                        |                                        |
| Scores                  | circRNA study                                                           | Sample  | total reads<br>circular junction | unique reads<br>circular junction | unique reads<br>linear-5'<br>junctions | unique reads<br>linear-3'<br>junctions |
|                         |                                                                         | K562    |                                  |                                   |                                        |                                        |
|                         |                                                                         | Gm12878 |                                  |                                   |                                        |                                        |
|                         |                                                                         | Sknshra |                                  |                                   |                                        |                                        |
|                         |                                                                         | H1hesc  |                                  |                                   |                                        |                                        |
|                         | Salzman2013                                                             | Nhek    |                                  |                                   |                                        |                                        |
|                         |                                                                         | Hepg2   |                                  |                                   |                                        |                                        |
|                         |                                                                         | A549    |                                  |                                   |                                        |                                        |
|                         | Ag04450                                                                 |         |                                  |                                   |                                        |                                        |

**Figure S1**



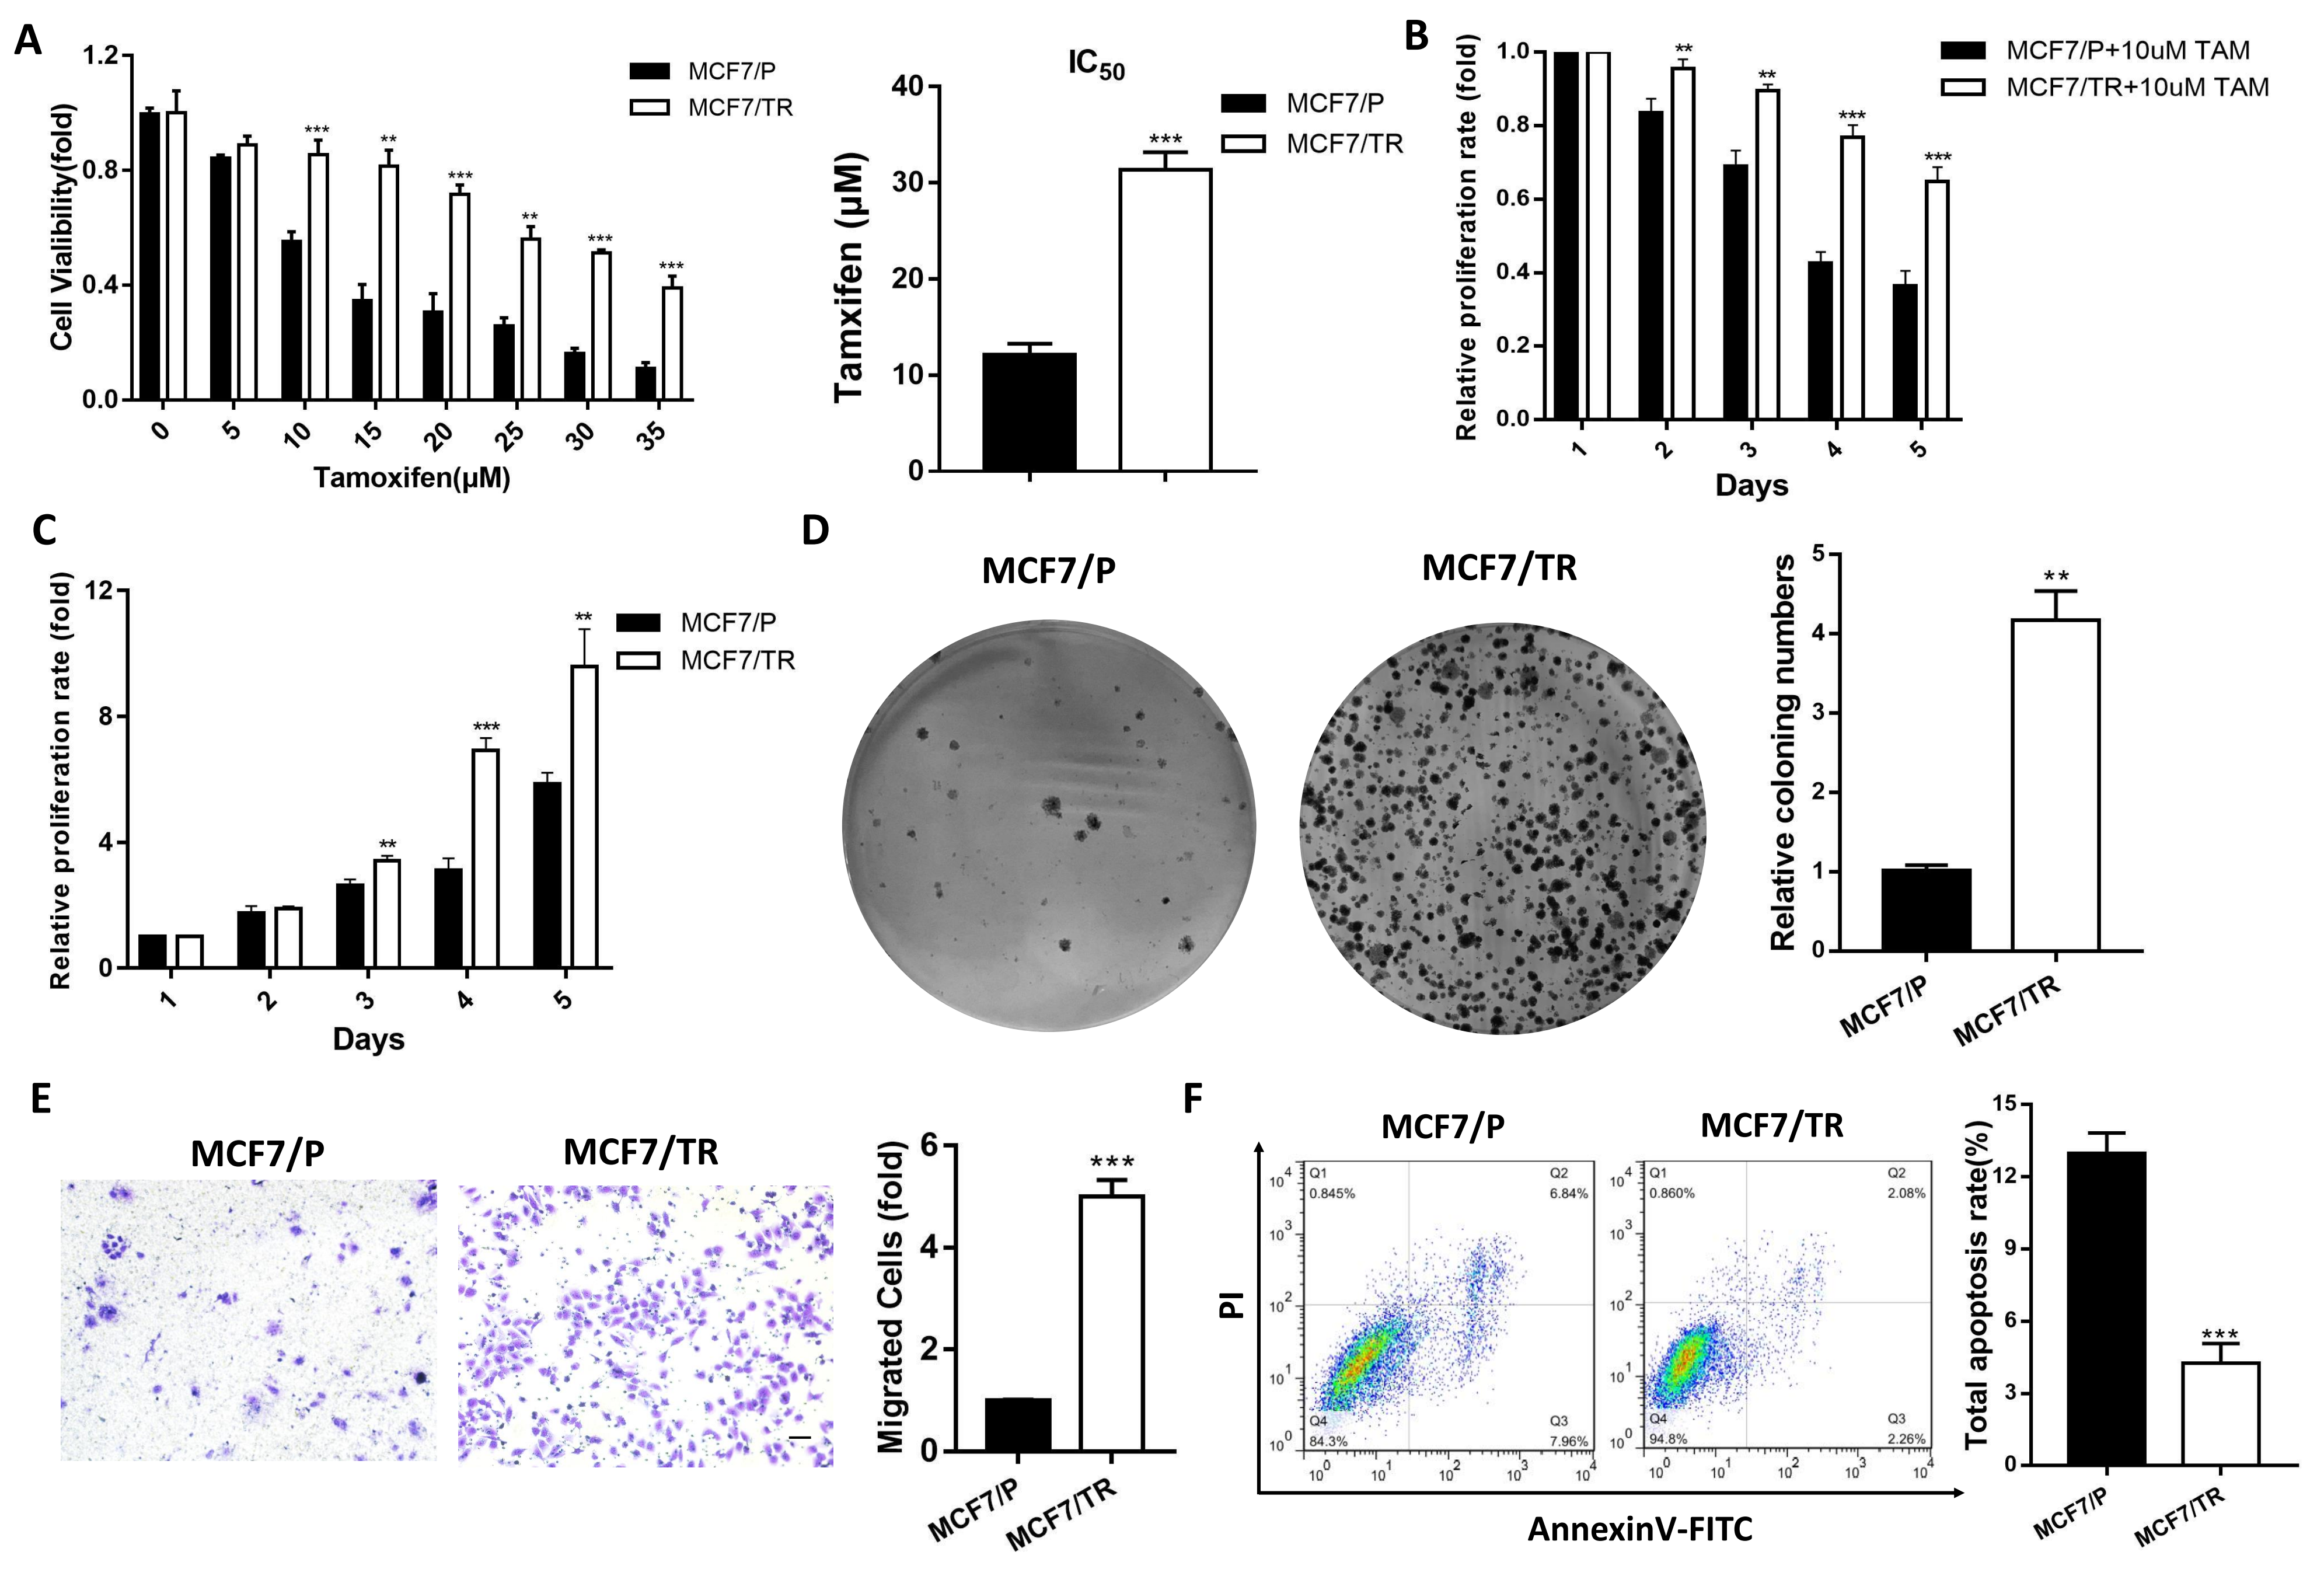

**Figure S2**



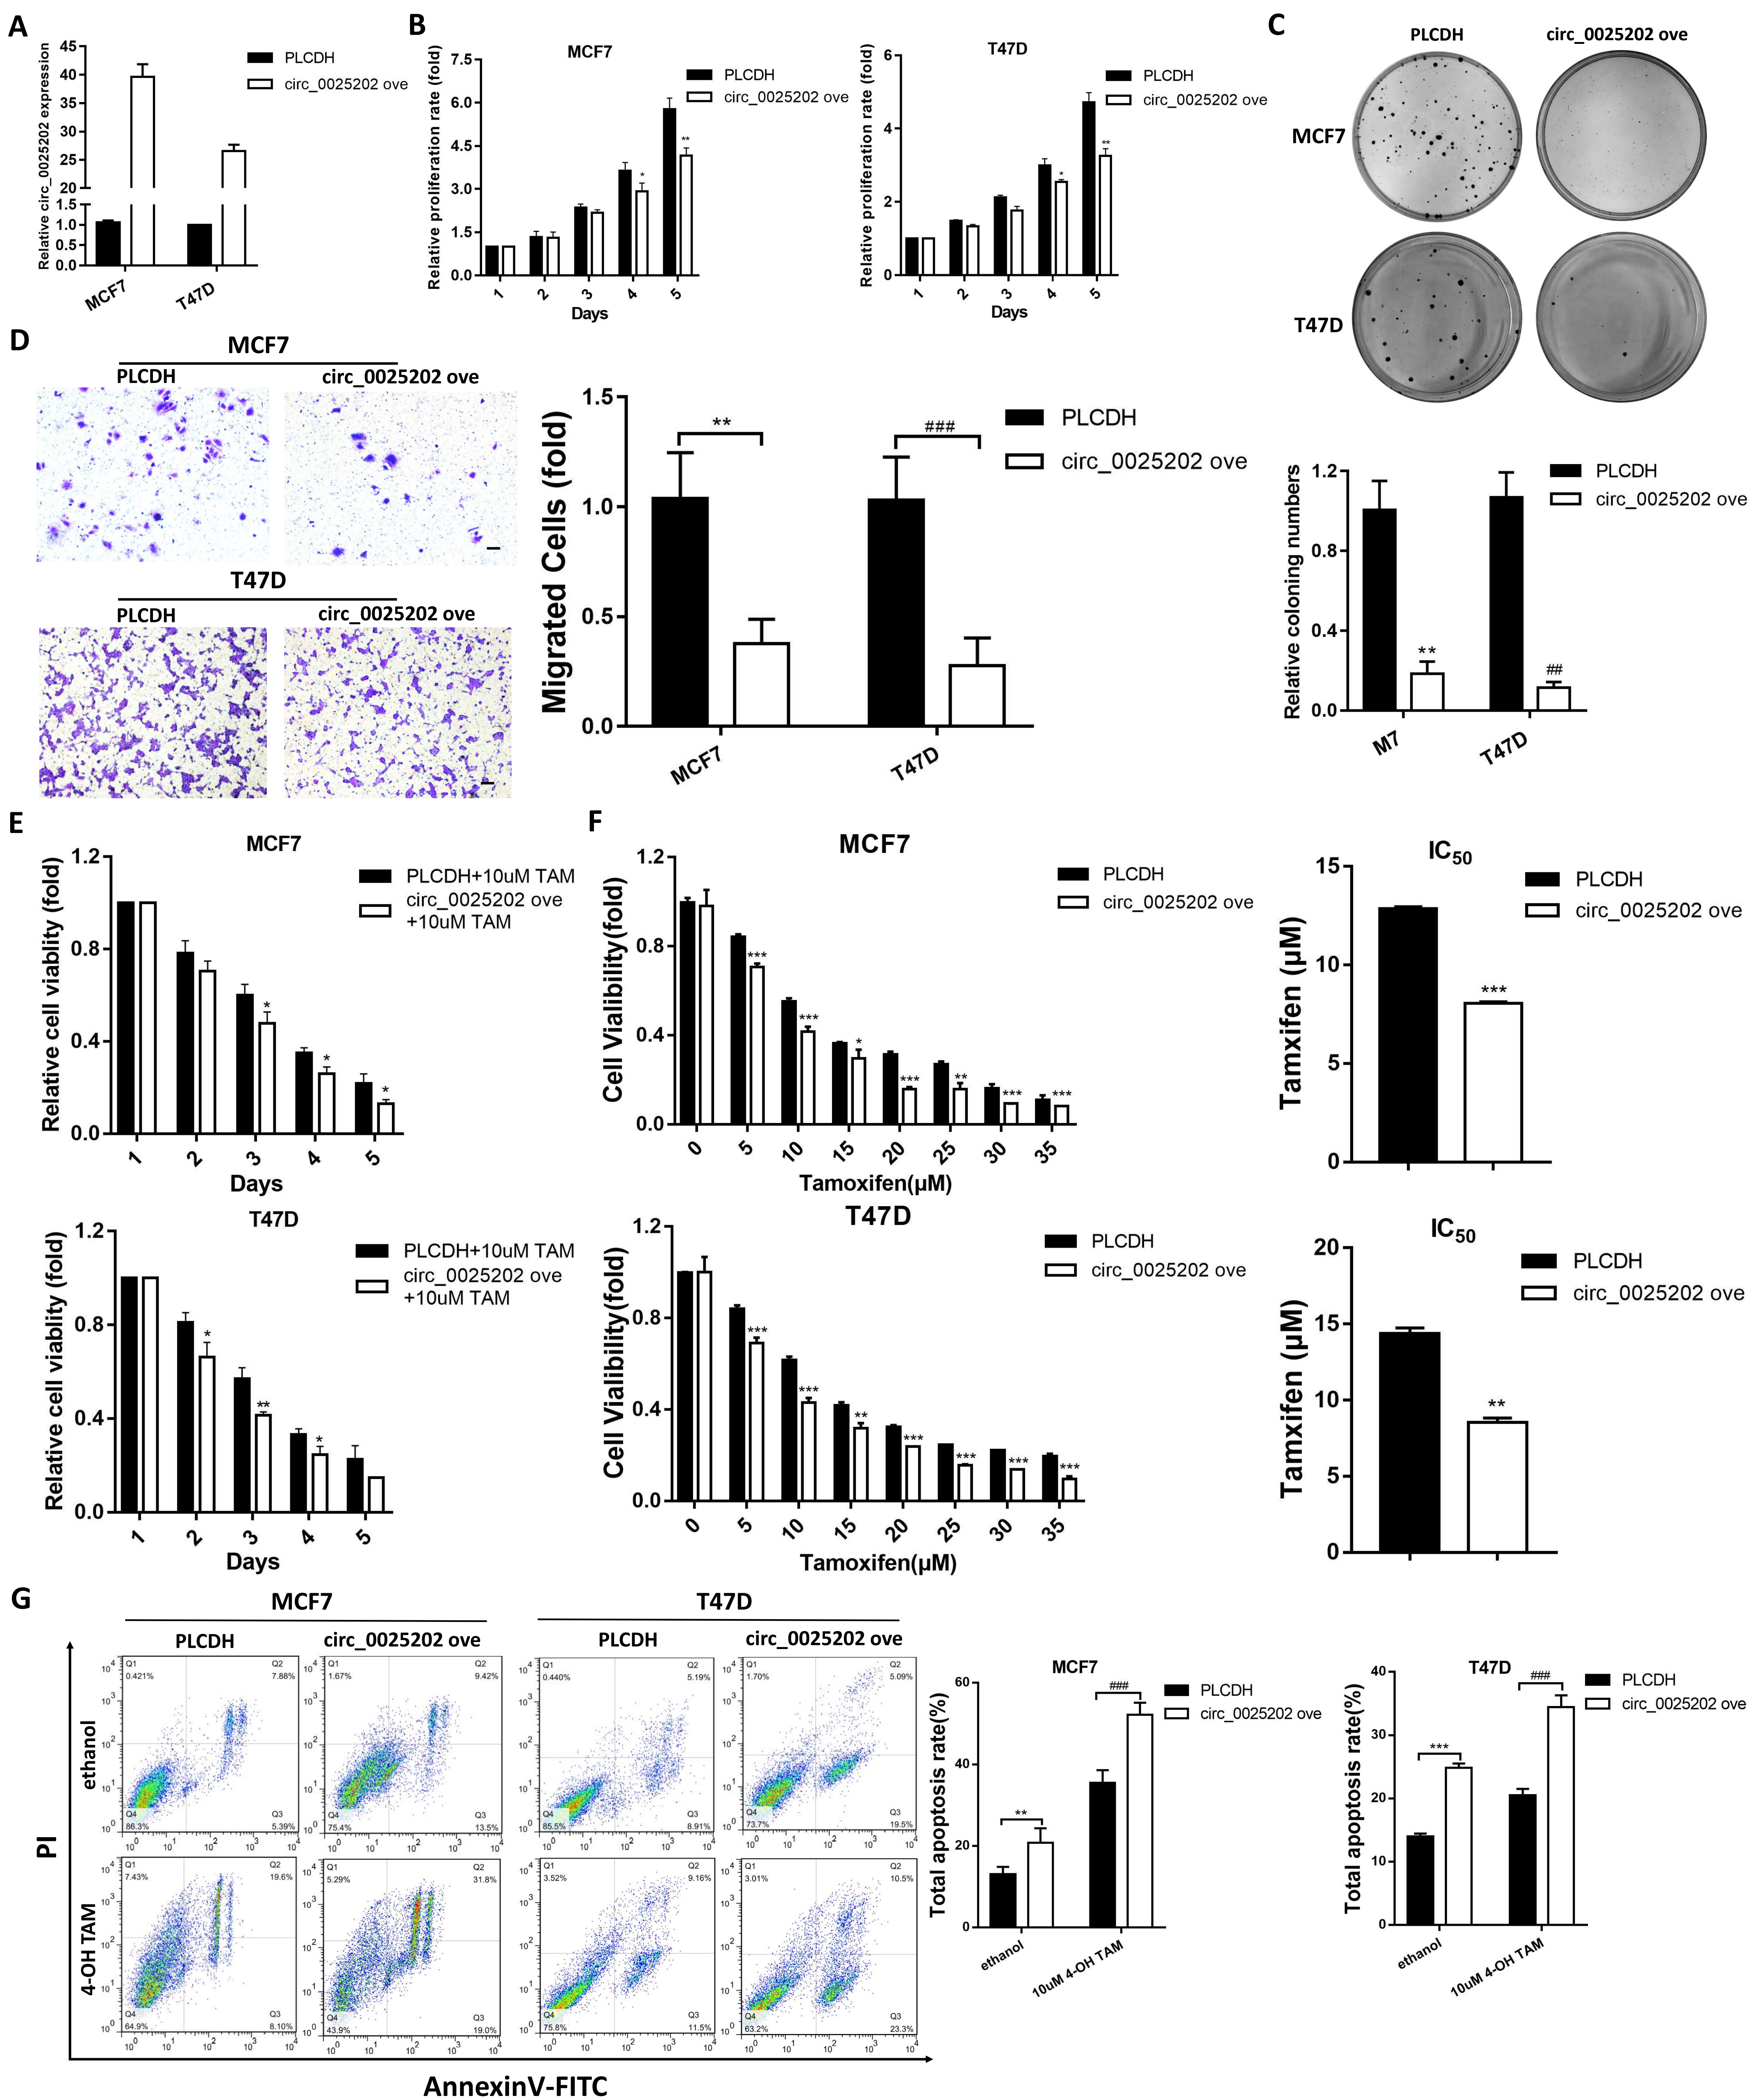

Figure S3



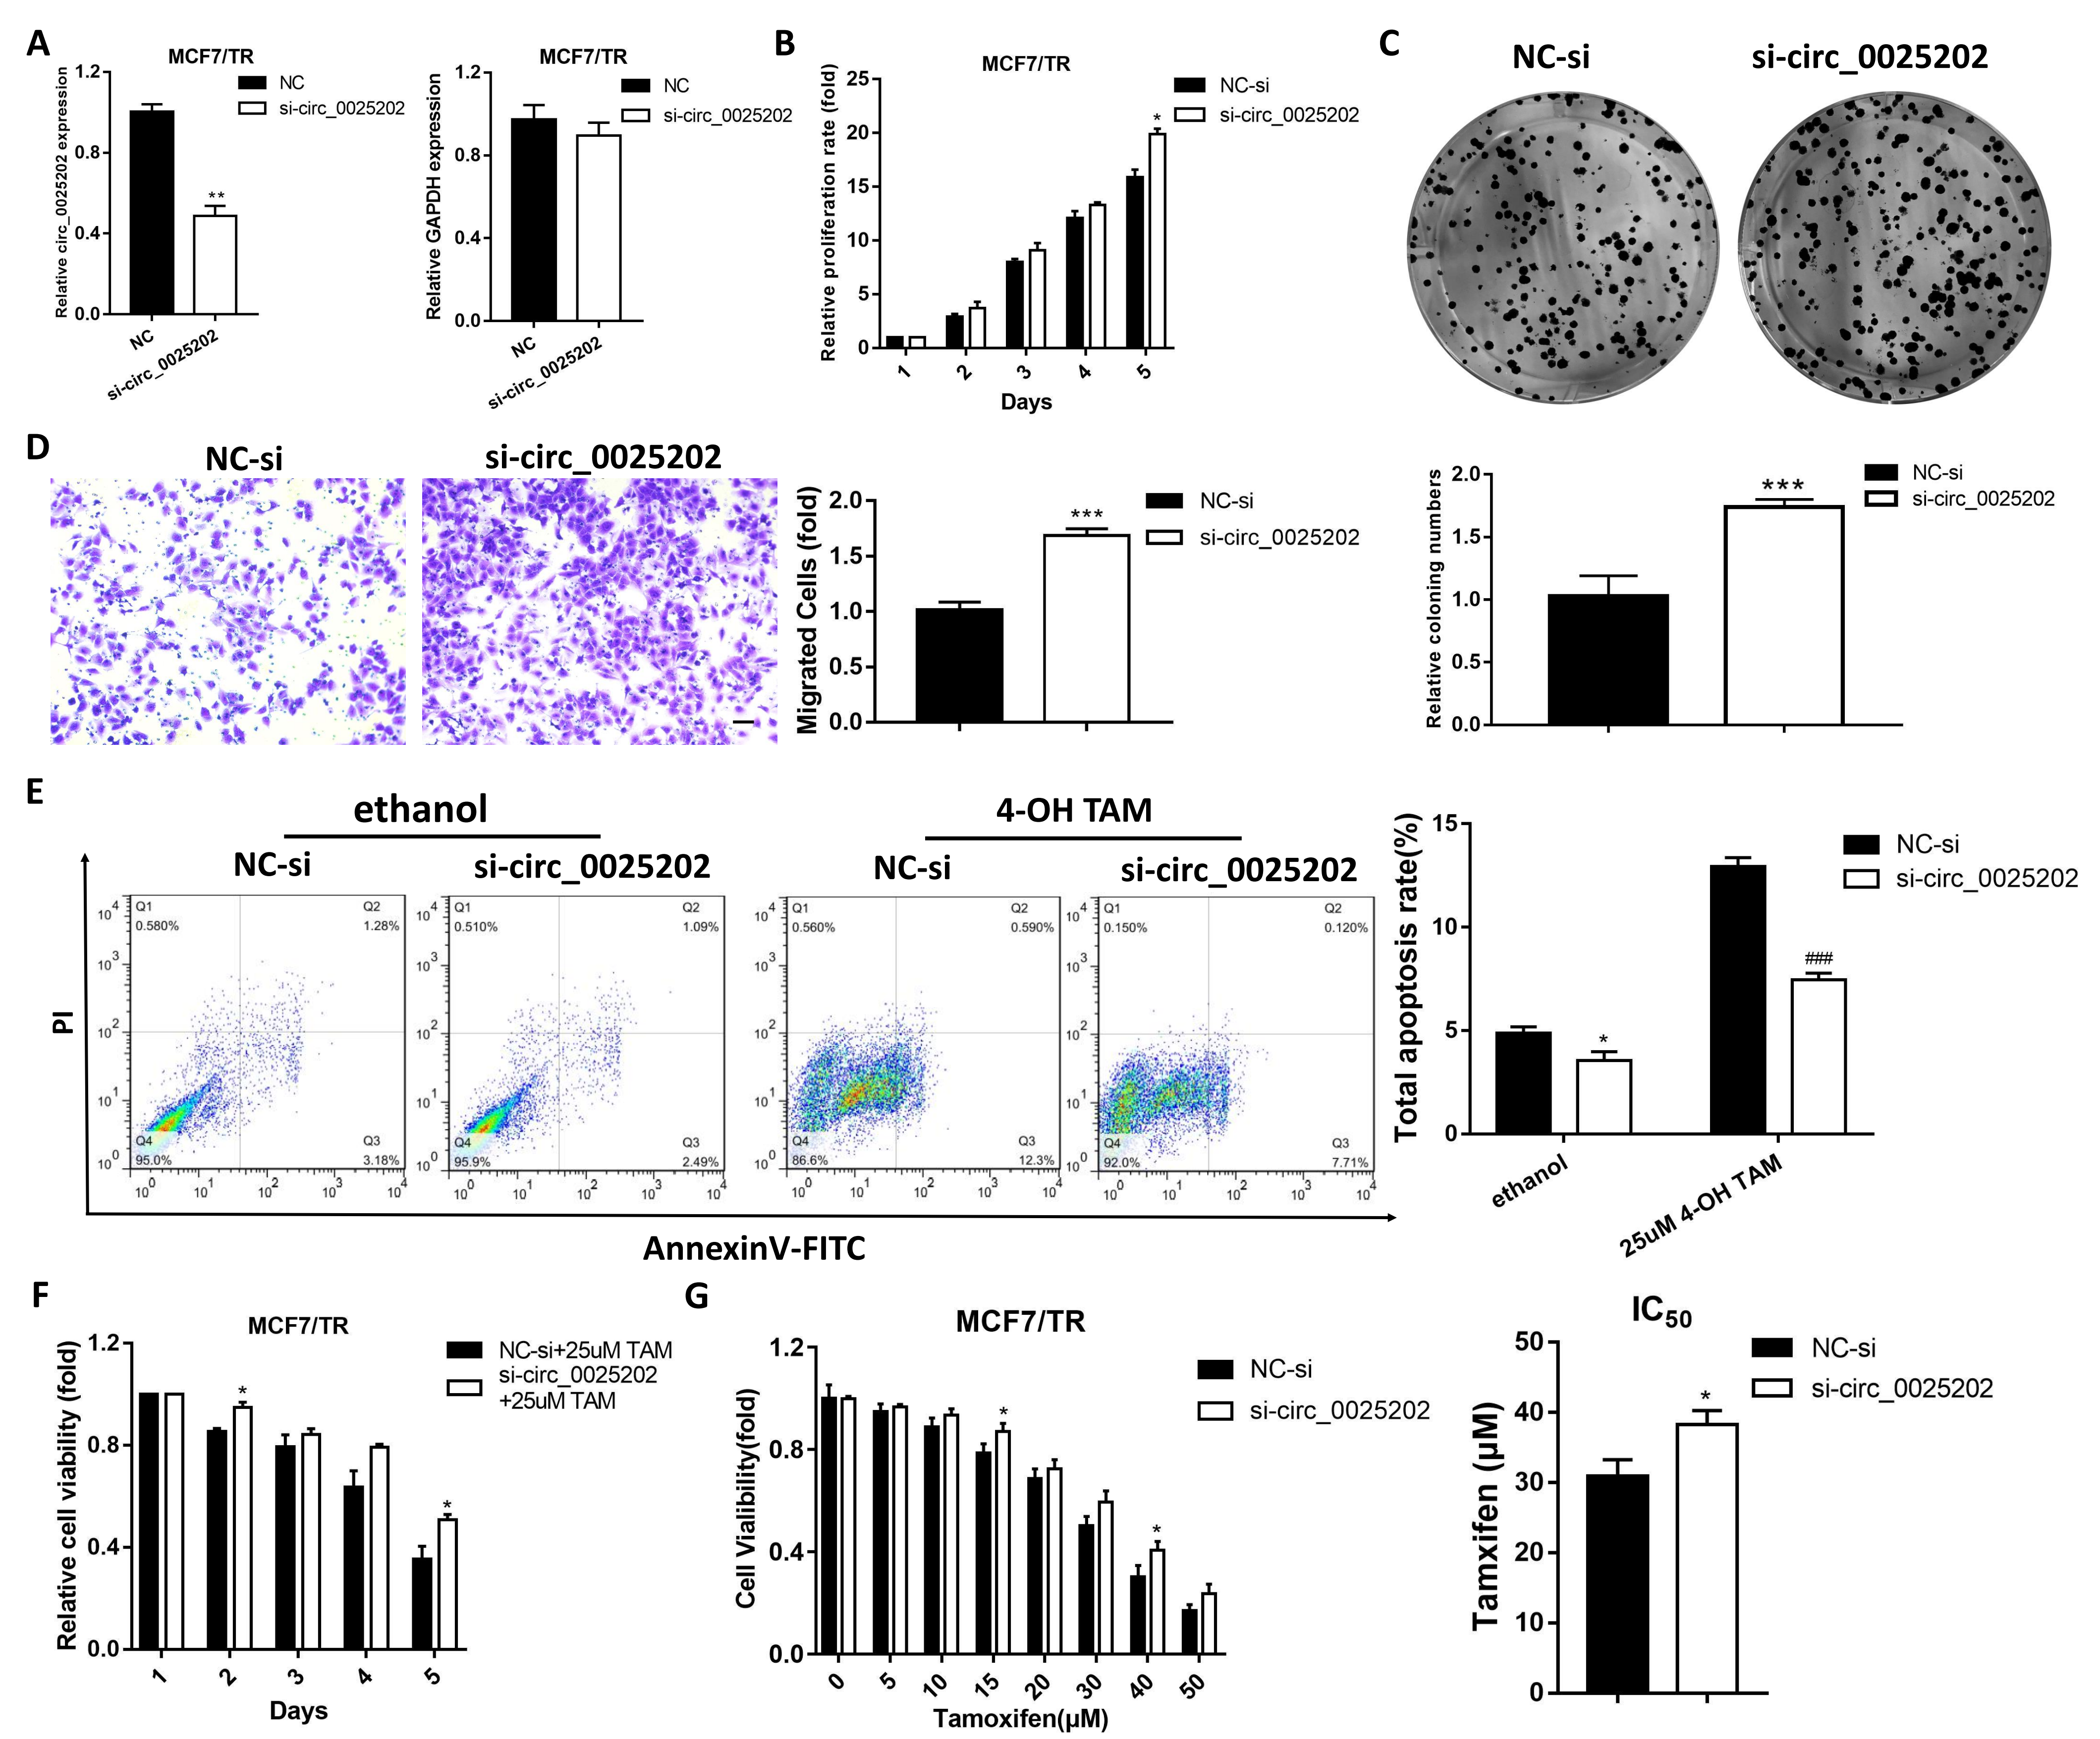

Figure S4



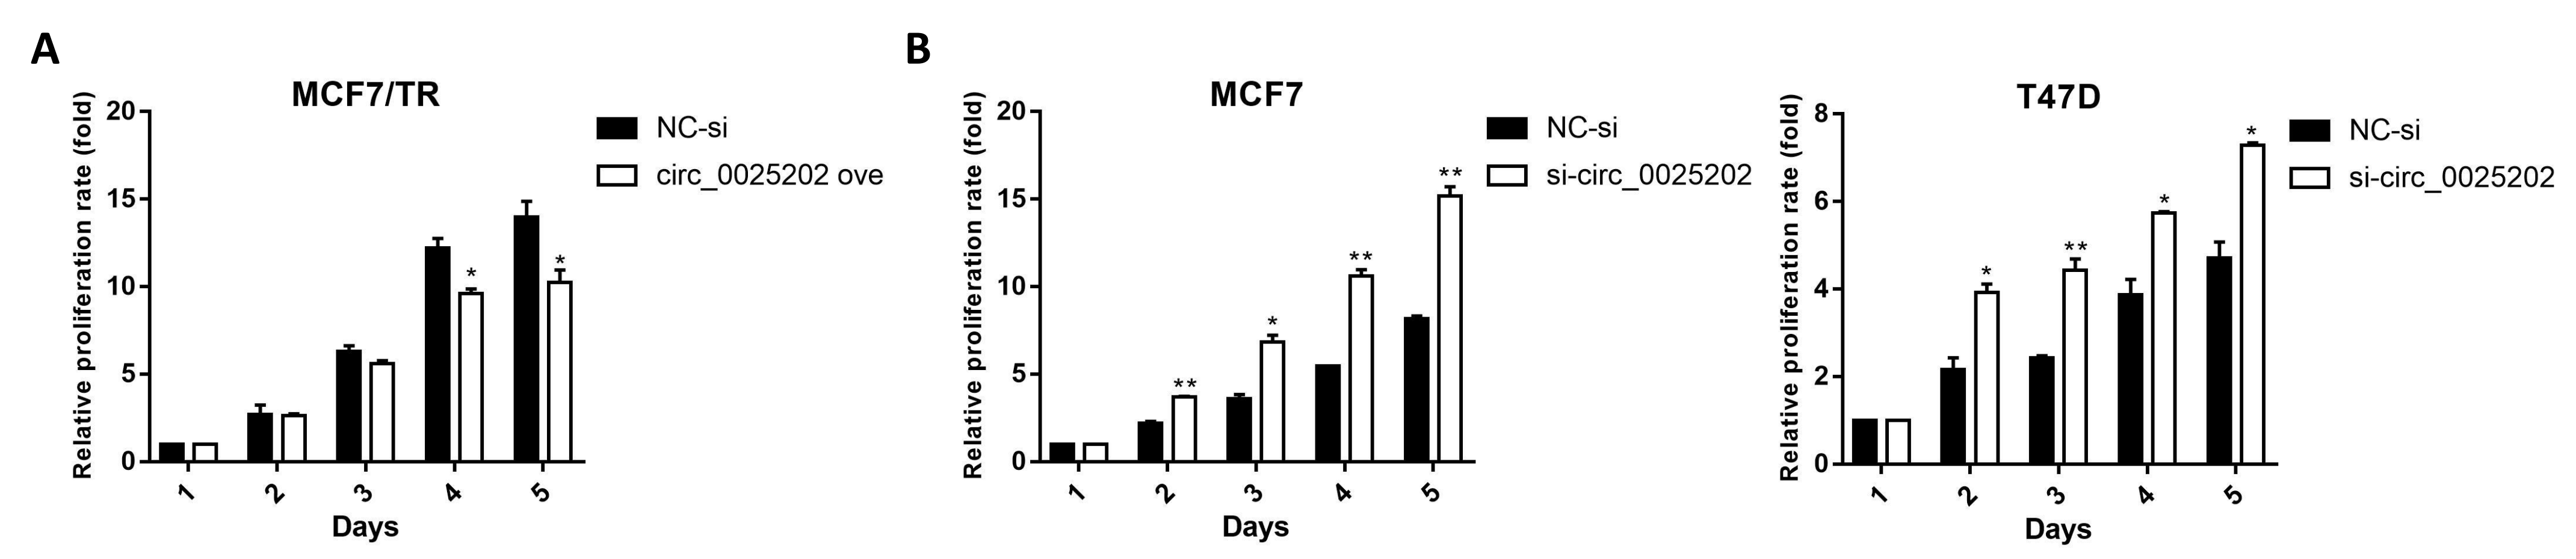

**Figure S5**



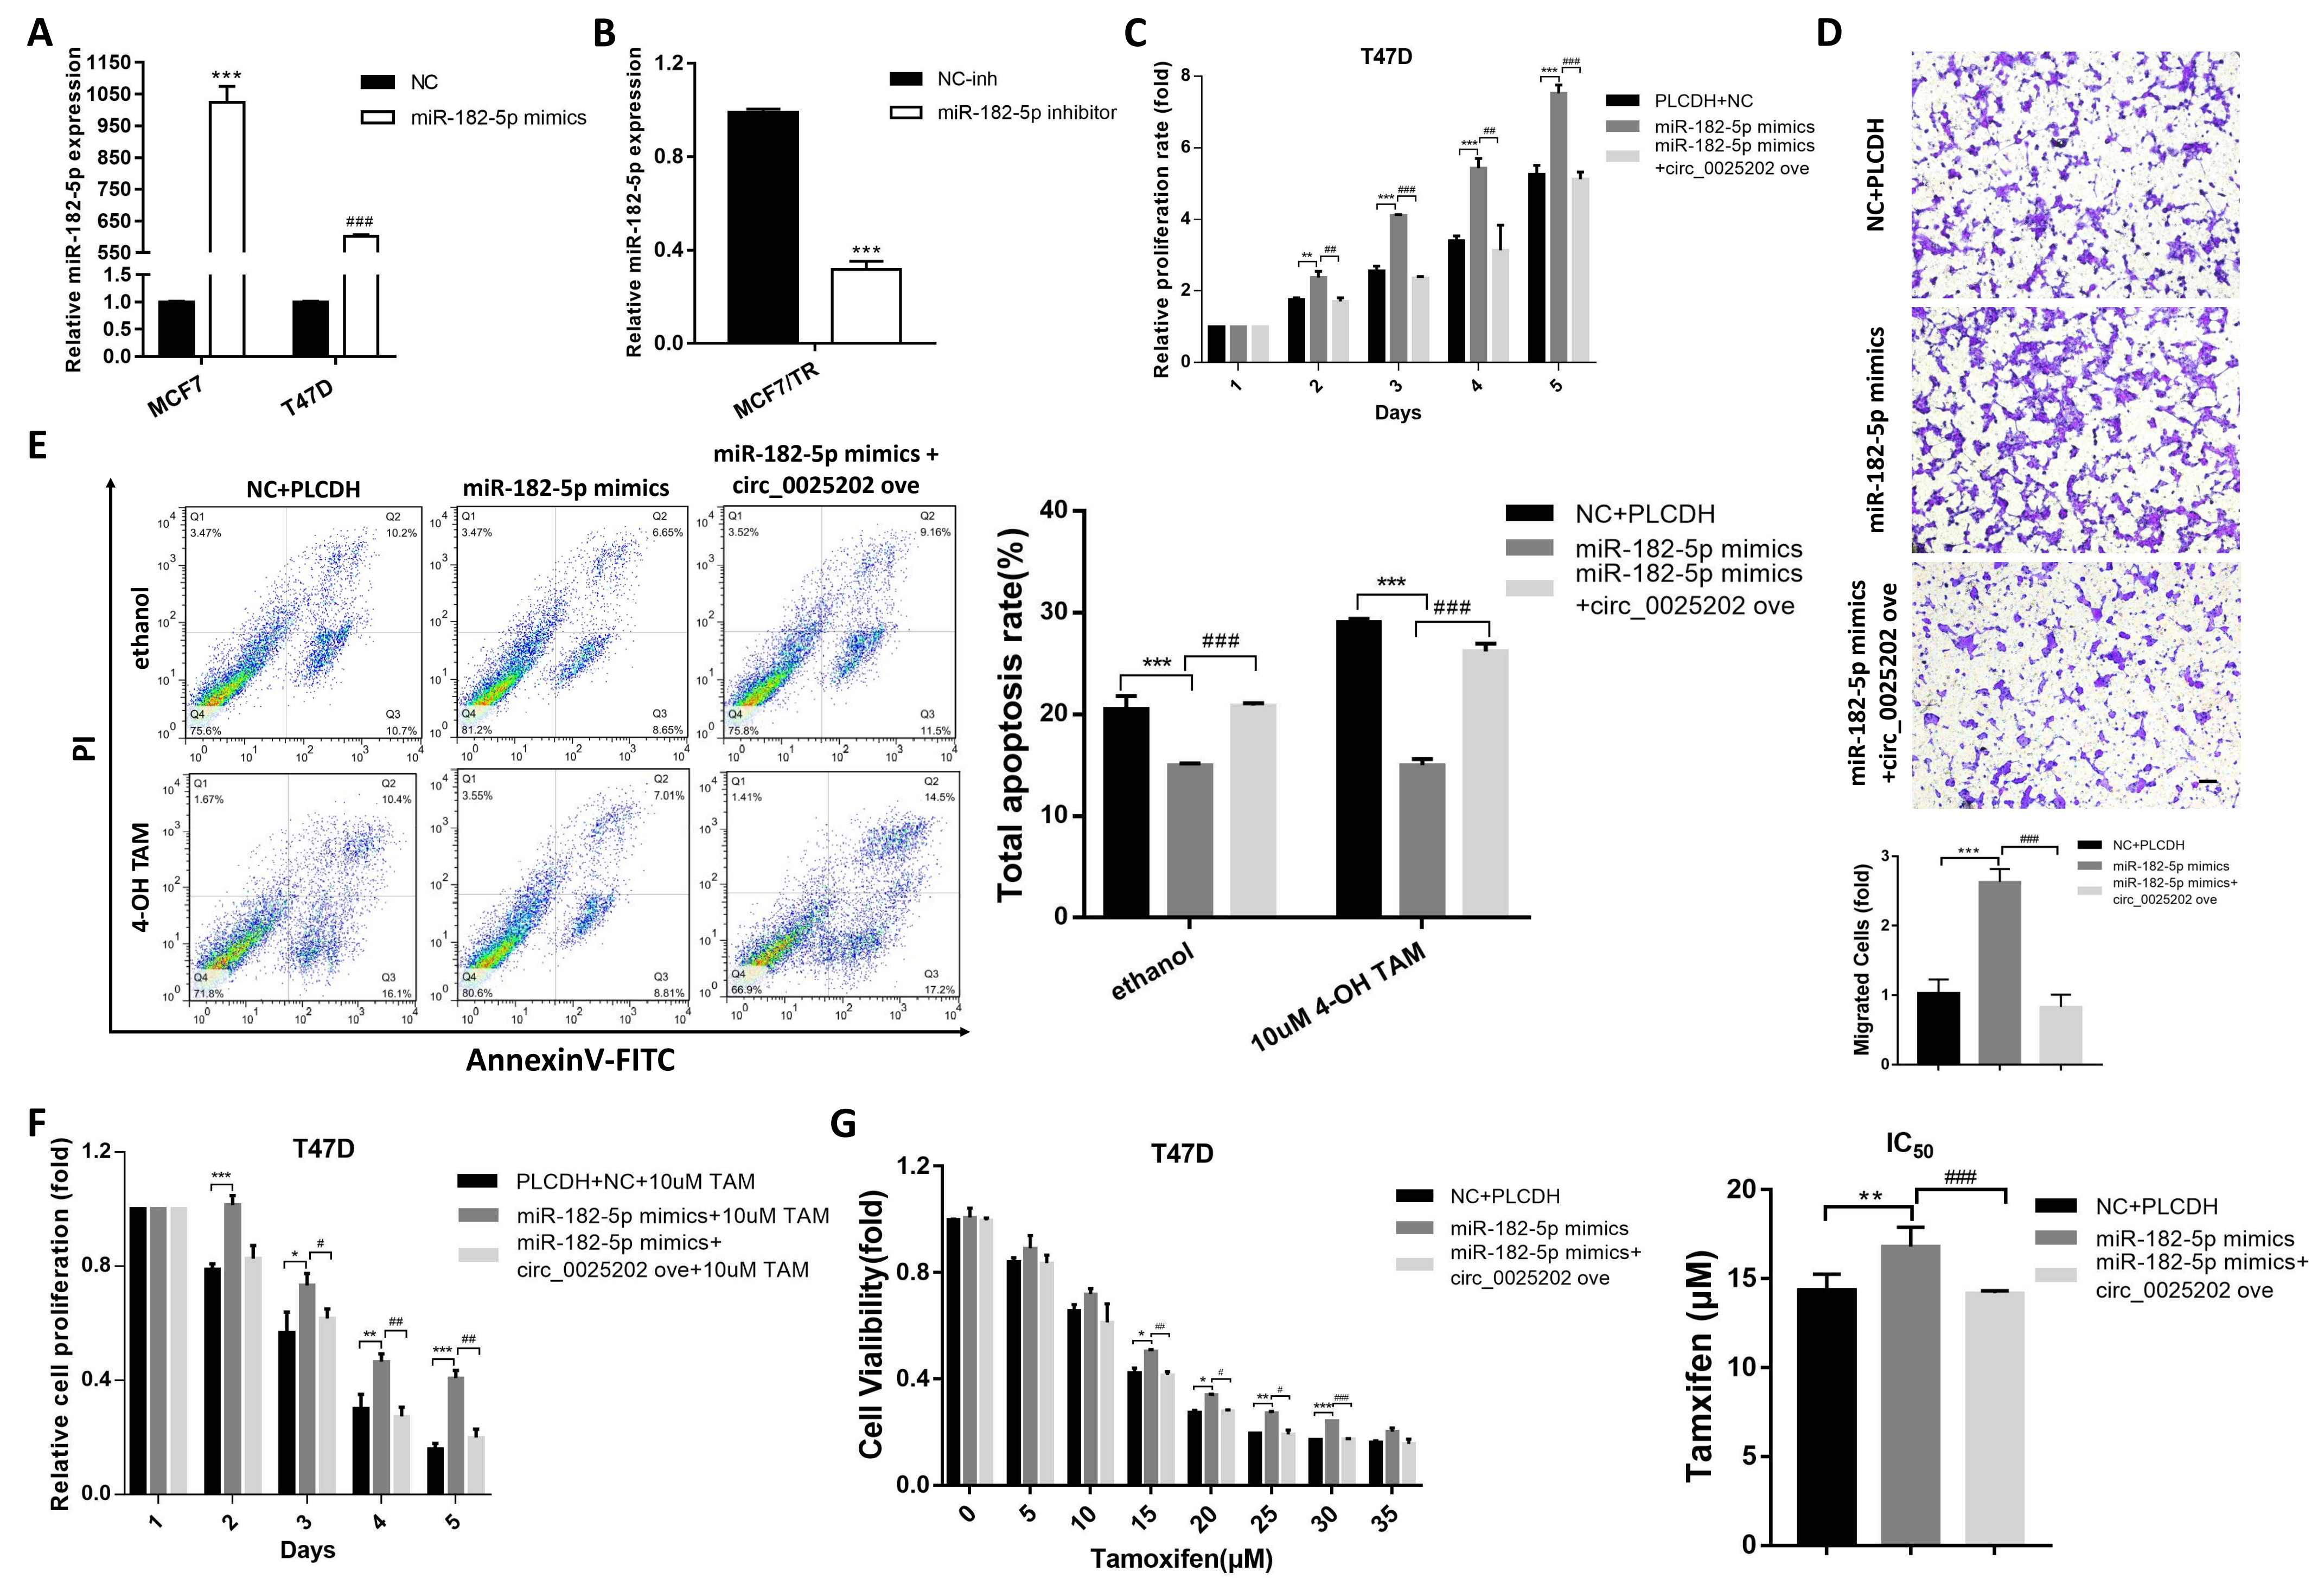

Figure S6



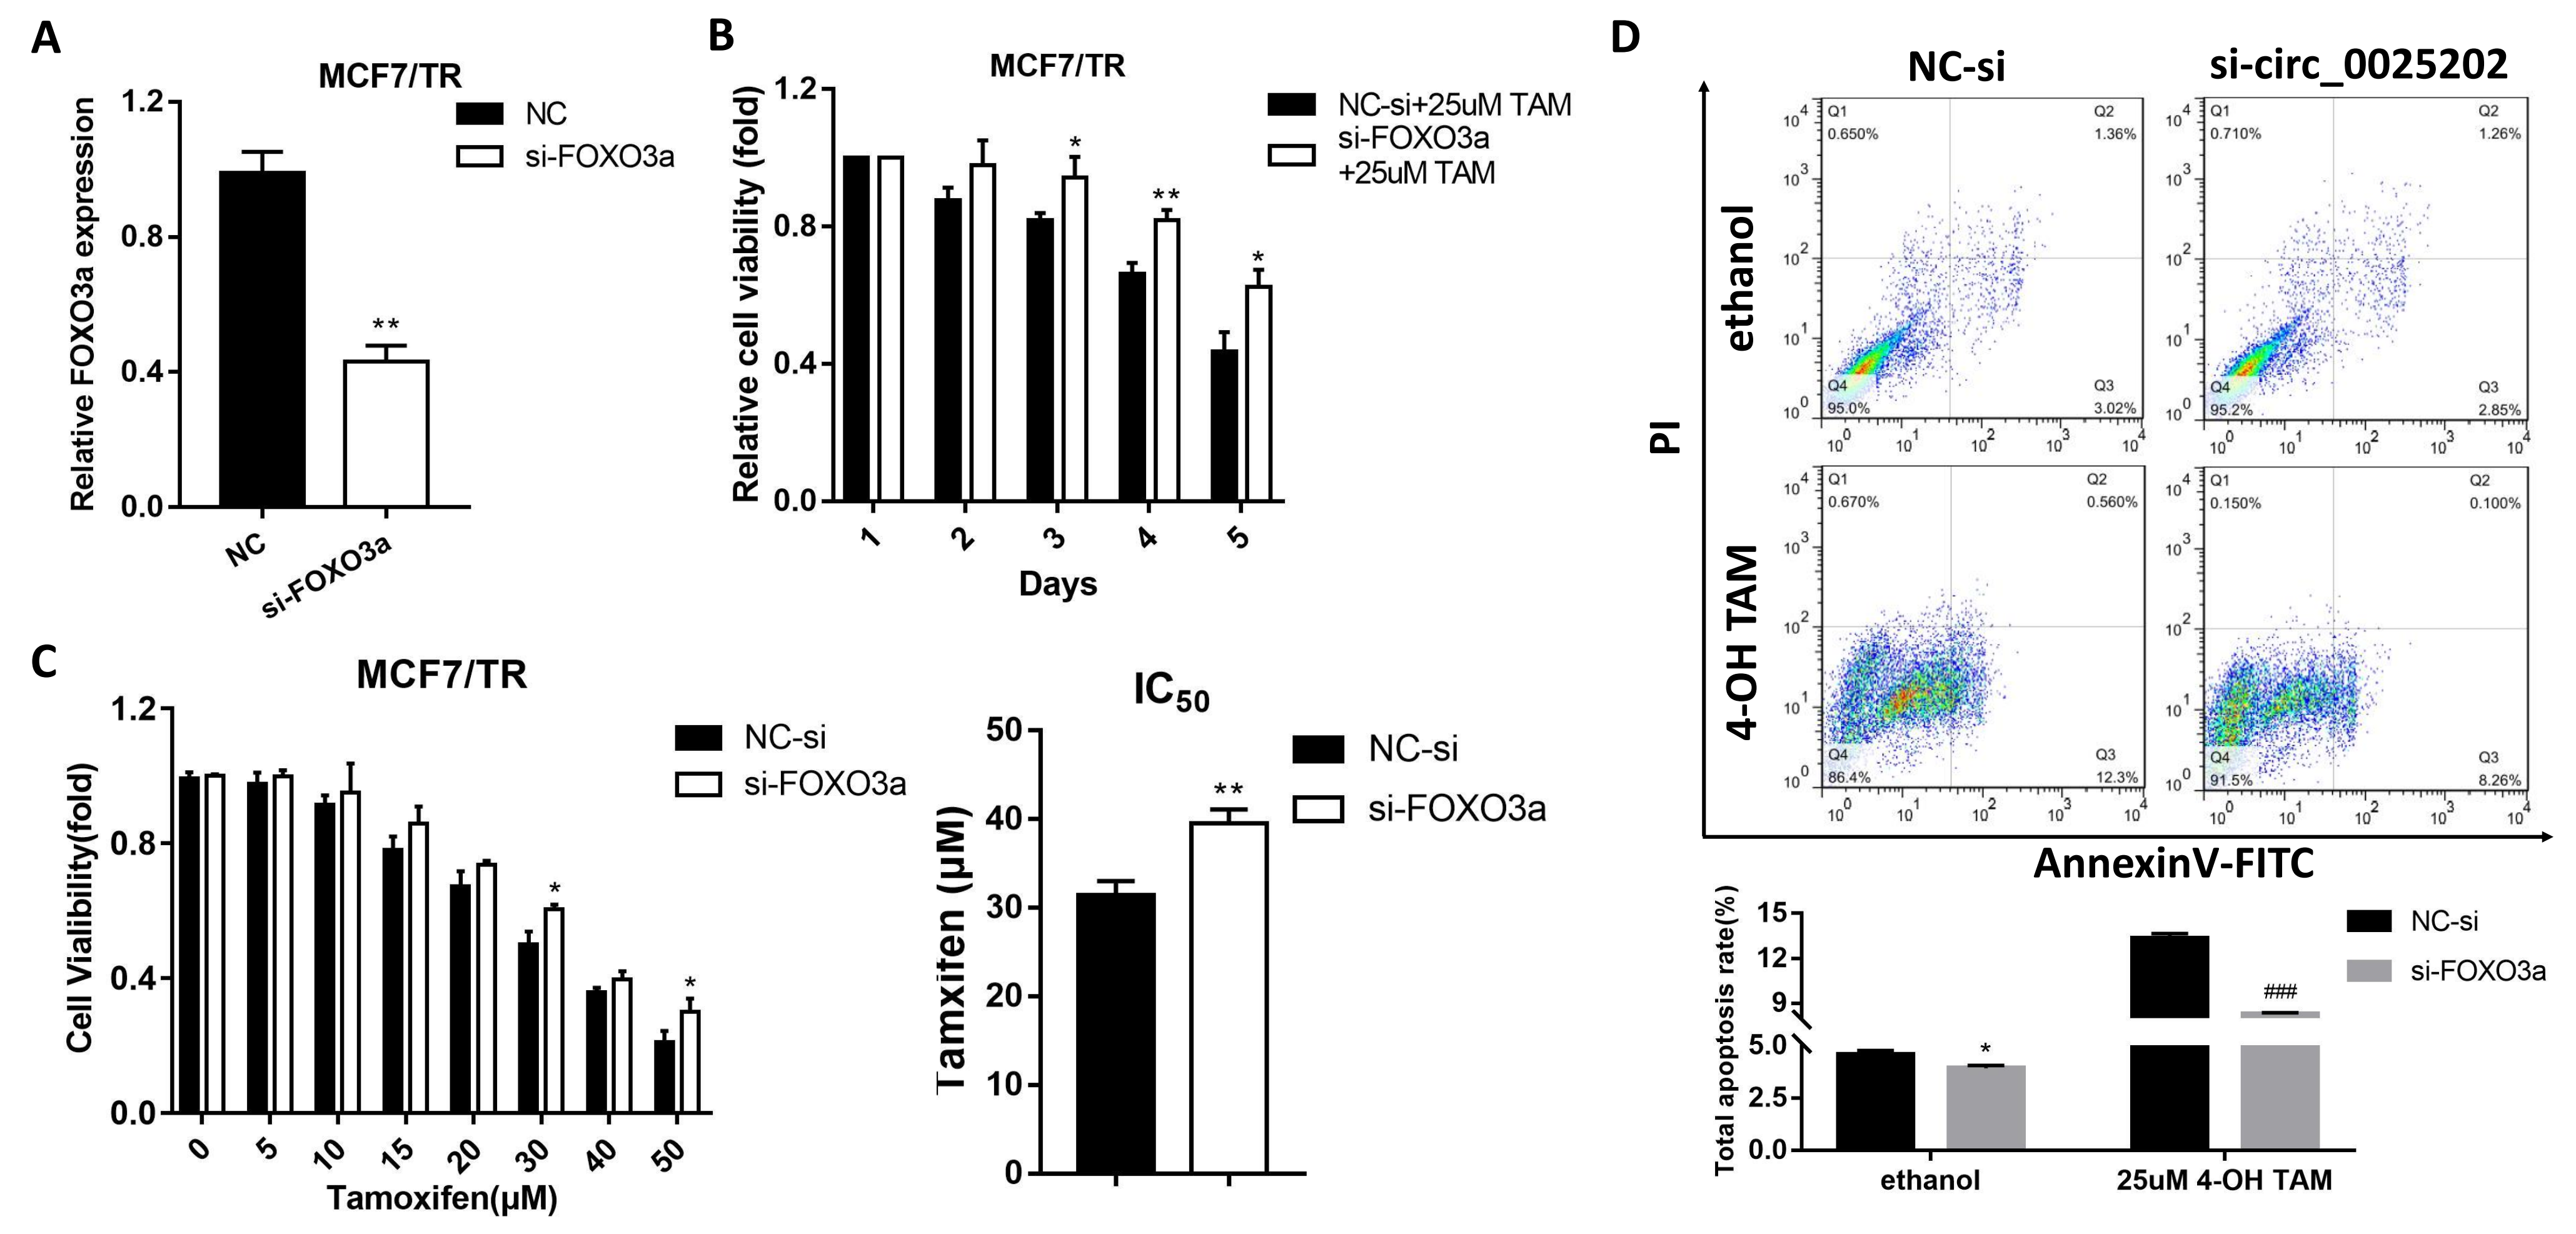

Figure S7



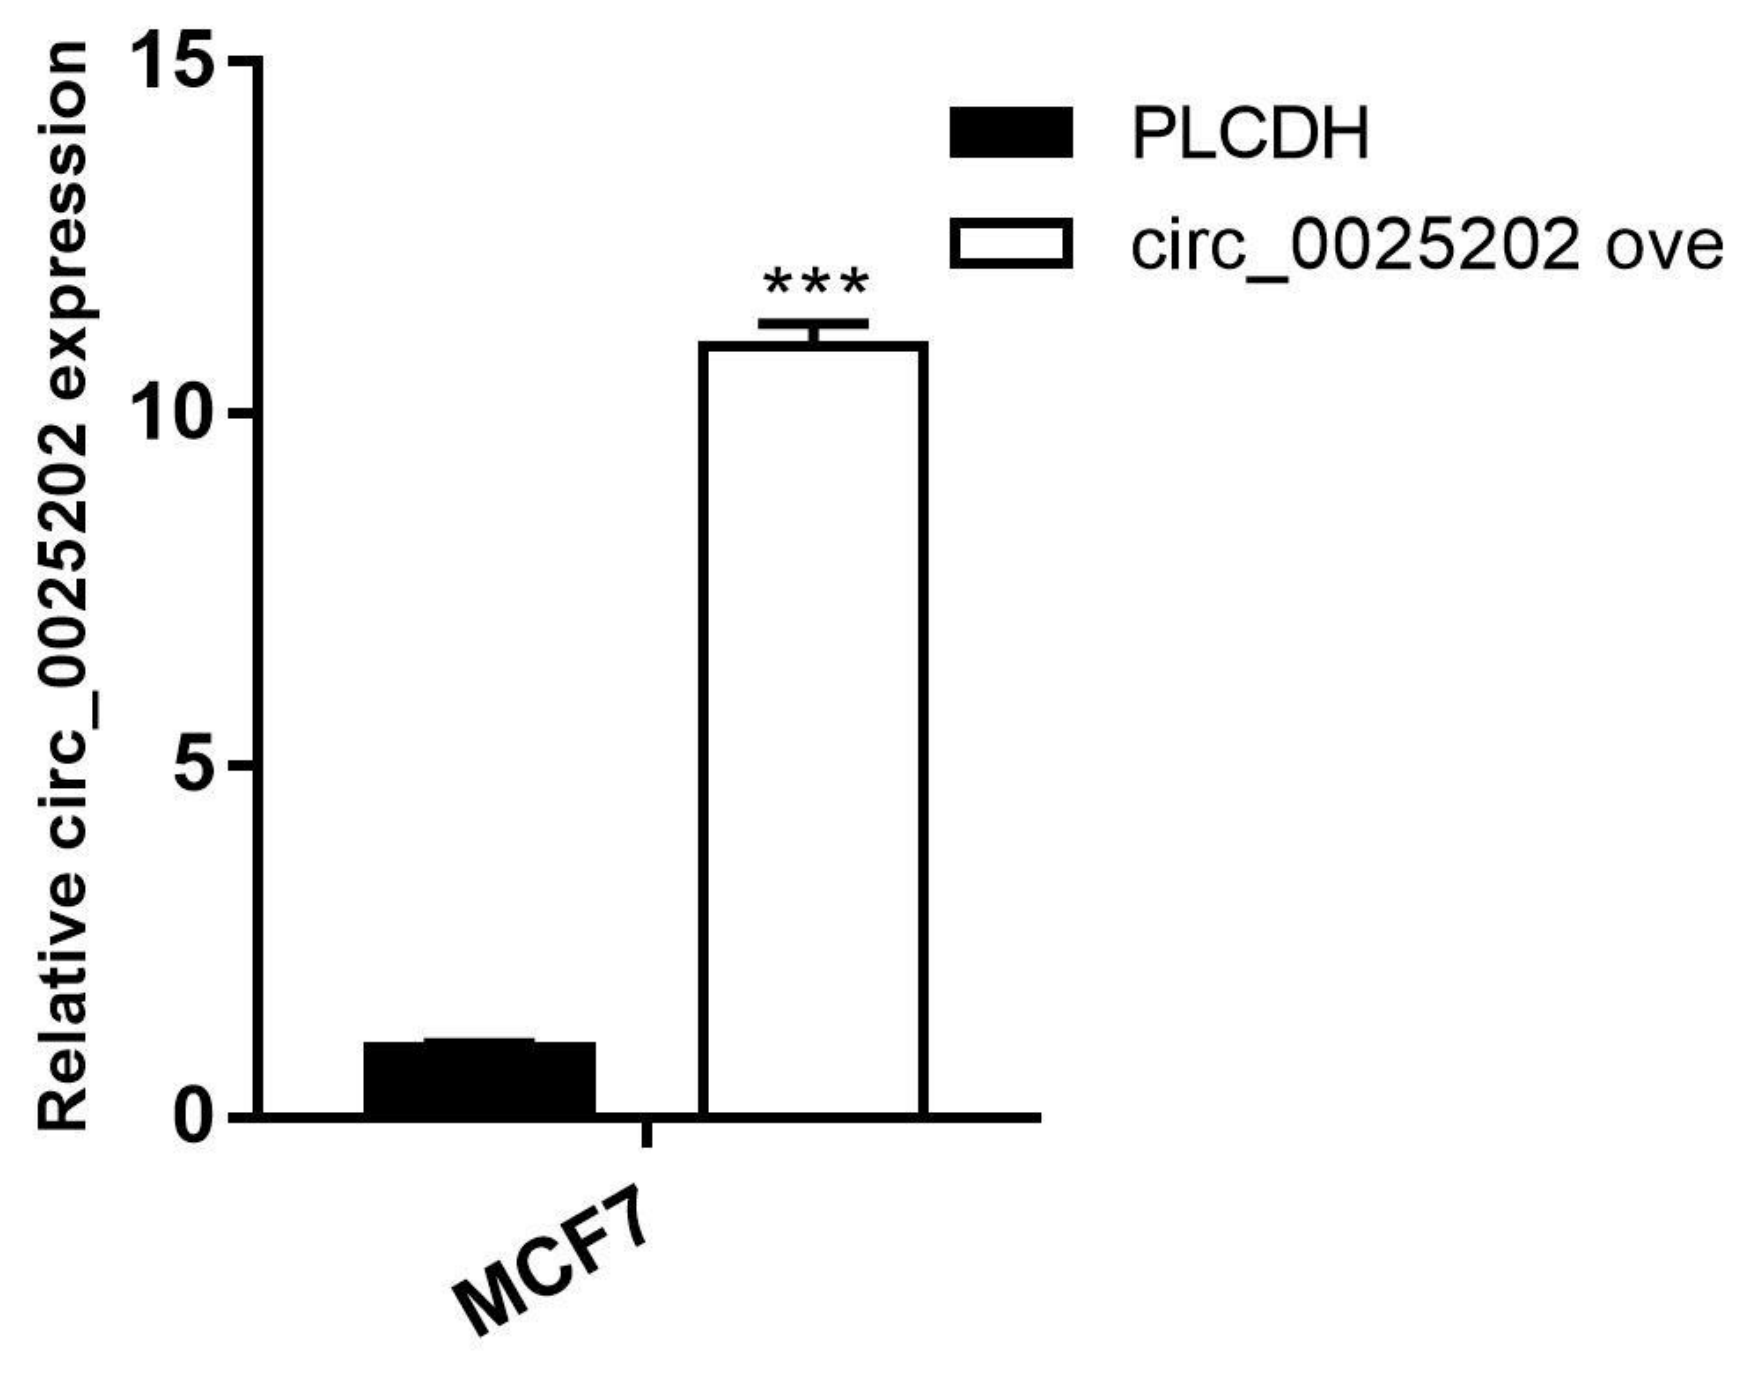

Figure S8



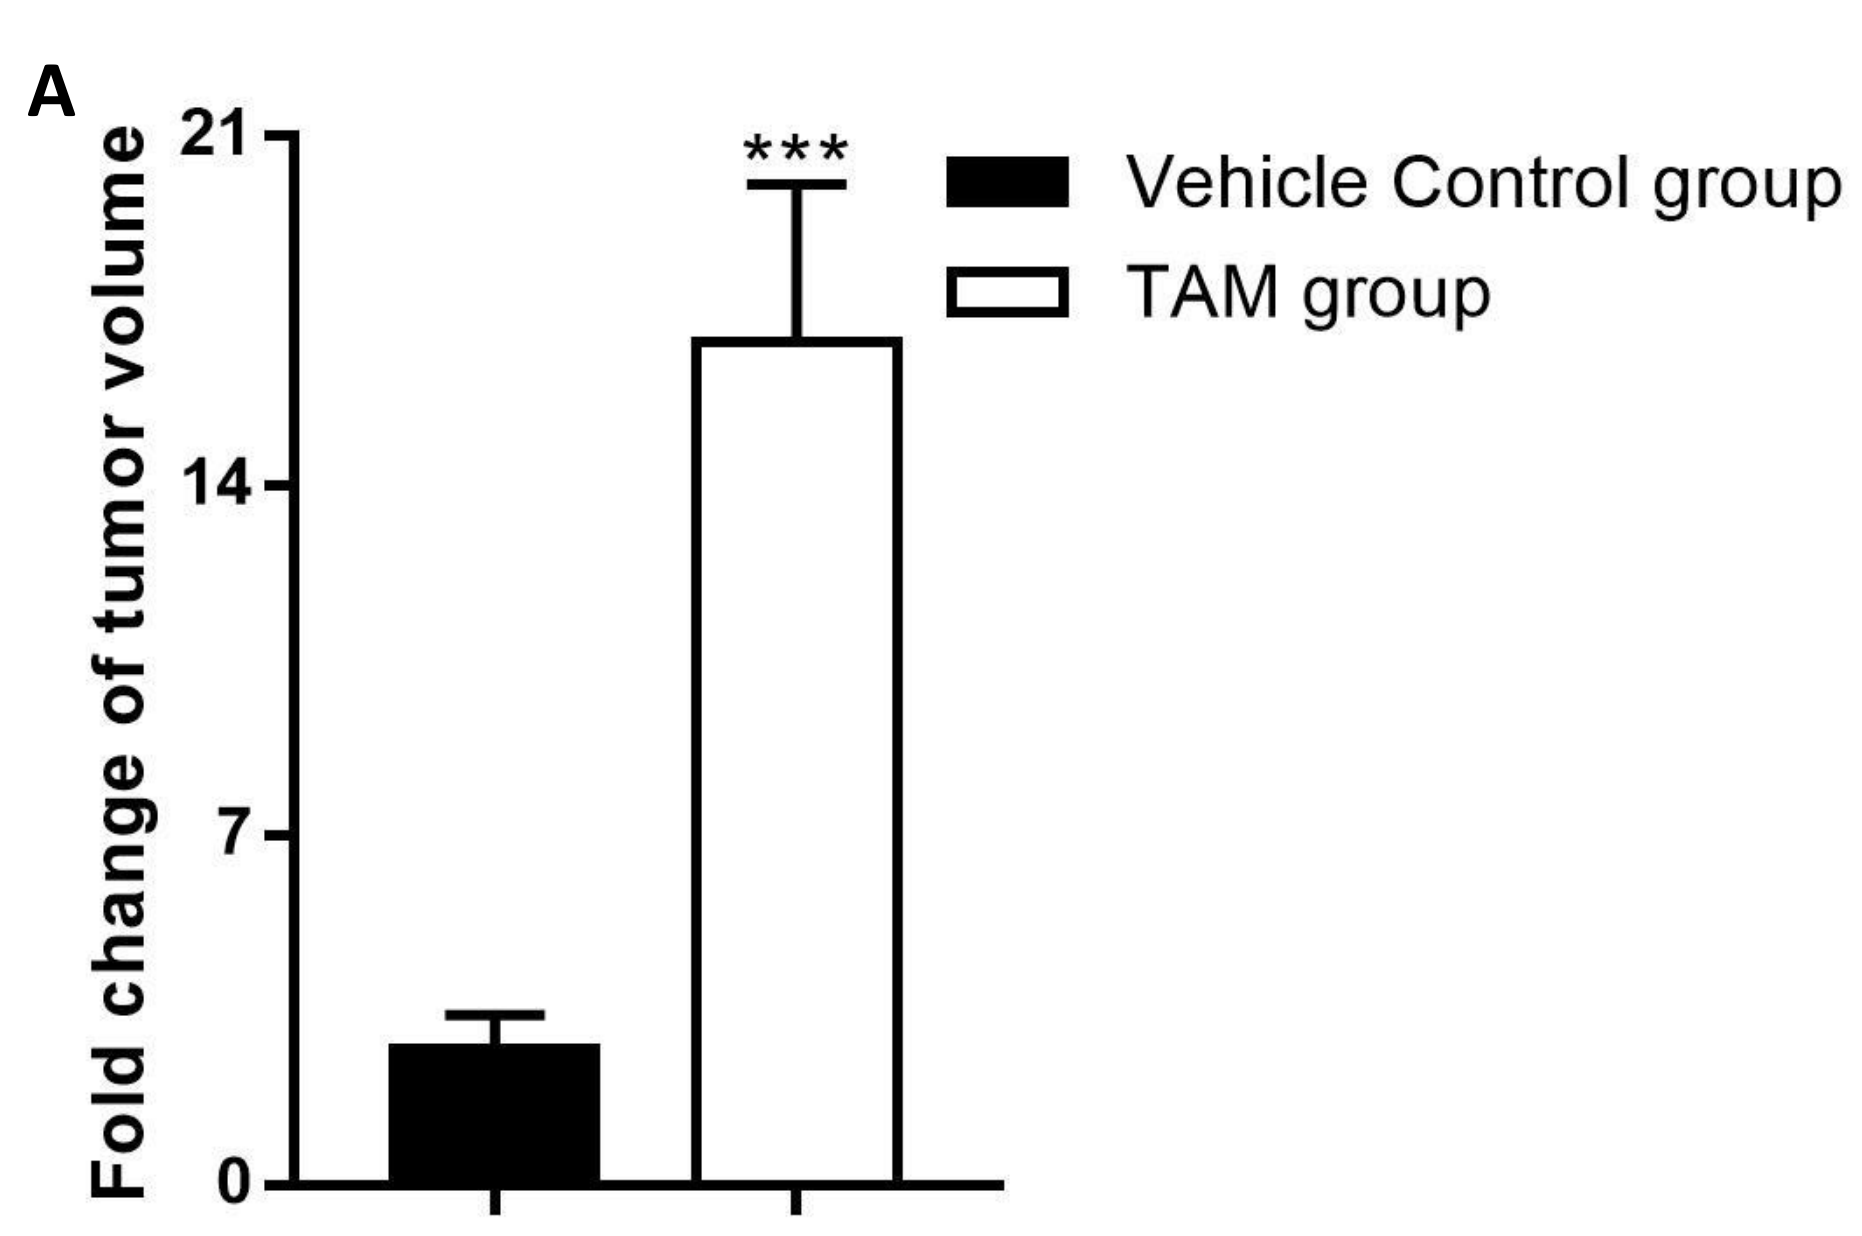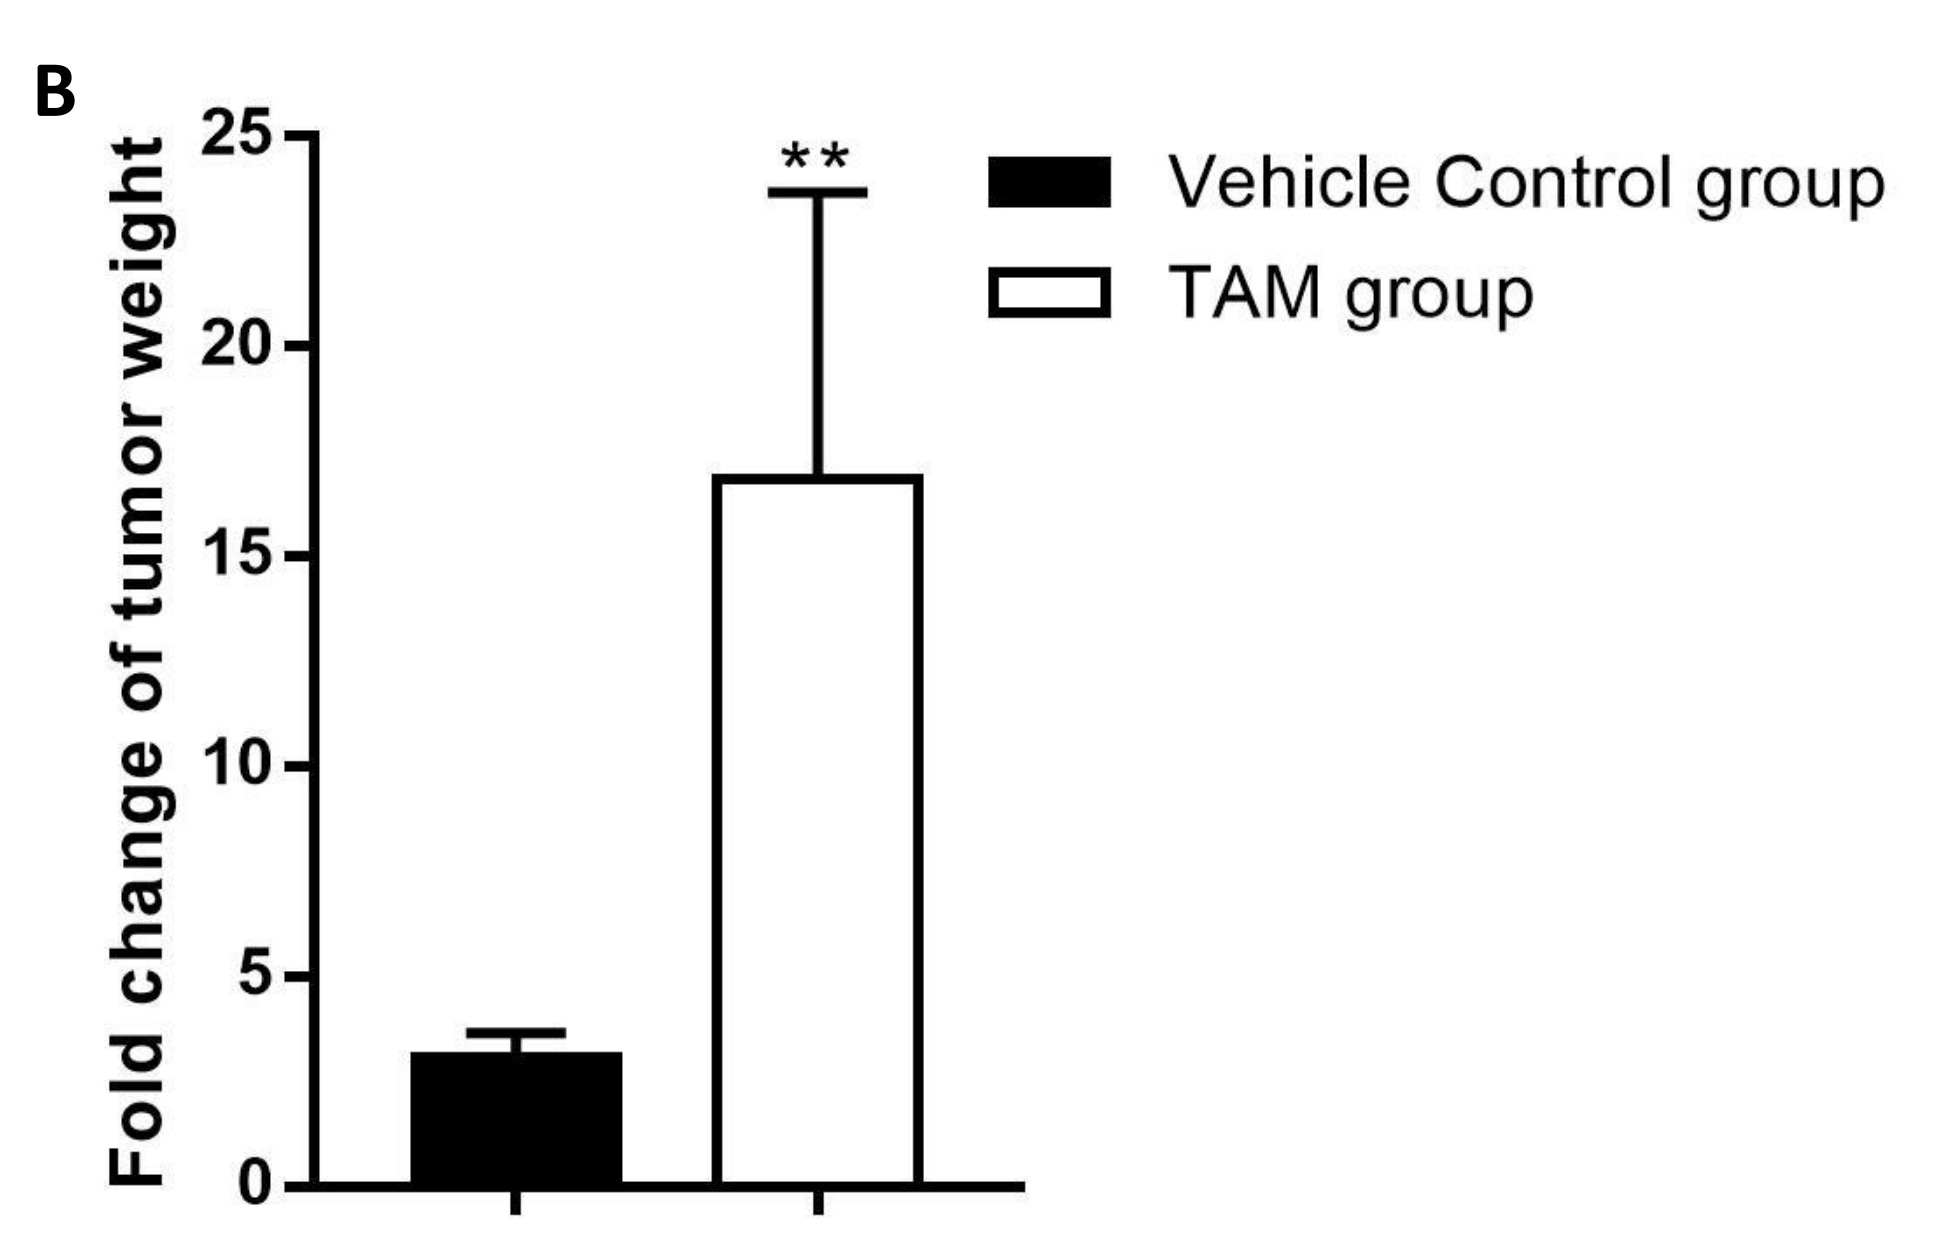

**Figure S9**



## Supplementary Figure Legends

**Figure S1:** Screening of differently expressed circRNAs between MCF7/P and MCF7/TR cell lines. **A.-H.** Verification of the expression level of other 9 candidates circRNAs in MCF7/P and MCF7/TR cell lines by qRT-PCR. **I.** Information of hsa\_circ\_0025202 in CircBase database. \* $p < 0.05$ , \*\* $p < 0.01$ , \*\*\* $p < 0.001$ .

**Figure S2:** Features of MCF7/P and MCF7/TR cell lines. **A.**  $IC_{50}$  and **B.** Cell viability assessed by MTT assay in MCF7/P and MCF7/TR treated with TAM or TAM at the indicated time points. **C.** Cell proliferation activity, **D.** colony formation capacity, **E.** cell migration, and **F.** cell apoptosis were measured respectively by MTT, cell colony formation, transwell assays and Annexin V-FITC assay in MCF7/P and MCF7/TR cell lines. Data are presented as means  $\pm$  SEM of at least three independent experiments. \*\* $p < 0.01$ , \*\*\* $p < 0.001$ . Scale bar: 50  $\mu$ m.

**Figure S3:** Hsa\_circ\_0025202 suppresses growth, metastasis and increases TAM sensitivity of HR-positive BC cells *in vitro*. **A.** Verification of the efficiency of hsa\_circ\_0025202 ove in MCF7 and T47D cells by qRT-PCR. **B.** Cell proliferation activity, **C.** colony formation capacity, **D.** cell migration potential and **G.** cell apoptosis were measured respectively by MTT, cell colony formation, transwell assay and Annexin V-FITC assay in MCF7 and T47D cells transfected with hsa\_circ\_0025202 ove. **E. and F.** cell cytotoxicity and  $IC_{50}$  assays in MCF7 and T47D cells transfected with or without hsa\_circ\_0025202 ove. Data are presented as means  $\pm$  SEM of at least three independent experiments. \* $p < 0.05$ , \*\* $p < 0.01$ , ## $p < 0.01$ , \*\*\* $p < 0.001$ , ### $p < 0.001$ . Scale bar: 50  $\mu$ m.

**Figure S4:** Knockdown of hsa\_circ\_0025202 promotes growth, metastasis and decreases TAM sensitivity of HR-positive BC cells *in vitro*. **A.** The expression of hsa\_circ\_0025202 and *GAPDH* were determined by qRT-PCR in MCF7/TR cells transfected with NC-si and si-circ\_0025202. **B.** MTT assay was conducted to evaluate cell proliferative ability. **C.** Colony formation in MCF7/TR cells. **D.** Transwell migration was conducted to evaluate cell migration ability (magnification,  $\times 100$ ). Scale bar: 50  $\mu$ m. **E.** Cells were treated with TAM (25 nM) or ethanol (control) and subjected to Annexin V-FITC and propidium iodine staining to detect apoptotic rate. **F.** MTT assay demonstrates



cell viability of MCF7/TR treated together with TAM. **G.** IC<sub>50</sub> assay shows the variation in TAM sensitivity. Data are presented as means ± SEM of at least three independent experiments. \*p < 0.05, \*\*p < 0.01, \*\*\*, ###p < 0.001.

**Figure S5:** CCK8 assay was utilized for analyzing the cell viability. **A.** Cell viability of MCF7/TR cells transfected with PLCDH or circ\_0025202 ove. **B.** Cell viability of MCF7 and T47D cells transfected with NC-si or si-circ\_0025202. Data are presented as means ± SEM of at least three independent experiments. \*p < 0.05, \*\*p < 0.01.

**Figure S6:** Has\_circ\_0025202 sponges miR-182-5p to regulate the tumor progression and TAM sensitivity of BC cells. **A.** Verification of the efficiency of miR-182-5p mimics in MCF7 and T47D cells by qRT-PCR. **B.** Verification of the efficiency of miR-182-5p inhibitor in MCF7/TR cells by qRT-PCR. **C.** Cell proliferation activity, **D.** cell migration potential and **E.** cell apoptosis measured respectively by MTT assay, transwell assay and Annexin V-FITC assay in T47D cells after transfection of miR-182-5p mimics combined with or without hsa\_circ\_0025202 ove. **F. and G.** MTT analysis for cell cytotoxicity and IC<sub>50</sub> in T47D cells treated with TAM after transfection of miR-182-5p mimics combined with or without hsa\_circ\_0025202 ove. Data are presented as means ± SEM of at least three independent experiments. \*, #p < 0.05, \*\*, ##p < 0.01, \*\*\*, ###p < 0.001. Scale bar: 50 μm.

**Figure S7:** FOXO3a downregulation decreases TAM sensitivity of MCF7/TR cells and protects cell from apoptosis. **A.** Verification of the efficiency of si-FOXO3a in MCF7/TR cells by qRT-PCR. **B.** MTT data for the proliferation of MCF7/TR cells treated with TAM after transfection of si-FOXO3a. **C.** MTT data for the cell cytotoxicity and IC<sub>50</sub> of MCF7/TR cells treated with TAM after transfection with si-FOXO3a. **D.** Annexin V-FITC assay was used to assess cell apoptosis in MCF7/TR cells transfected with si-FOXO3a. Data are presented as means ± SEM of at least three independent experiments. \*p < 0.05, \*\*p < 0.01, ###p < 0.001.



**Figure S8:** Verification of hsa\_circ\_0025202 level in the established stable M7/circ\_0025202 ovc cells by qRT-PCR. Data are presented as means  $\pm$  SEM of at least three independent experiments. \*\*\*p < 0.001.

**Figure S9:** Fold changes of tumor volume and weight in PBS group and TAM group between M7/PLCDH and M7/circ\_0025202 ovc group. **A.** Fold changes of tumor volume in PBS group and TAM group between M7/PLCDH and M7/circ\_0025202 ovc group. **B.** Fold changes of tumor weight in PBS group and TAM group between M7/PLCDH and M7/circ\_0025202 ovc group. Data are presented as means  $\pm$  SEM of at least three independent experiments. \*\*p < 0.01, \*\*\*p < 0.001.



**Table S1. Primers and oligoes used in this study**

| Name                        |       | Sequence                                          |
|-----------------------------|-------|---------------------------------------------------|
| <b>Plasmid construction</b> |       |                                                   |
| PLCDH-ciR                   | F     | CGGAATTCTGAAATATGCTATCTTACAGCAATGCCTCCTGCACCACCAA |
|                             | R     | CGGGATCCTCAAGAAAAAATATATTCACCAGGAAATGAGCTTGACAAA  |
| hsa_circ_0025202 wt         | F     | AGCTTTGTTTAAACCAATGCCTCCTGCACCACCAA               |
|                             | R     | CCGCTCGAGCAGGAAATGAGCTTGACAAAGTG                  |
| hsa_circ_0025202 mut        | F     | CTAGAAAAACCTCGGTTTTATGATGACATCAAG                 |
|                             | R     | CTTGATGTCATCATAAAACCGAGGTTTTTCTAG                 |
| FOXO3a 3'UTR wt1            | F     | CCGCTCGAGAGGATCACTGAGGAAGGGGAAGTG                 |
|                             | R     | GCTCTAGAGCTGTCCTCCACTGGCAGGCG                     |
| FOXO3a 3'UTR wt2            | F     | CCGCTCGAGACCCGTCCAGGACAGAACCGT                    |
|                             | R     | GCTCTAGATGCCTCTCACTCATACTTCTAGC                   |
| FOXO3a 3'UTR mut1           | F     | CTTGCTGAGAGCAGAGGGTTACCAGGGTTTTCTCTGTA            |
|                             | R     | TACAGAGAAAACCCCTGGTAACCCTCTGCTCTCAGCAAG           |
| FOXO3a 3'UTR mut2           | F     | AACCCTTTAGTGACAGGGTTACCTGAGTGG AGAGCTGA           |
|                             | R     | TCAGCTCTCCACTCAGGTAACCCTGTCACATAA                 |
| <b>RT-PCR</b>               |       |                                                   |
| hsa_circ_0052375 (TRIM28)   | div-F | CCAACCAGCGGAAATGTGAG                              |
|                             | div-R | TGCACACGCTTCTGTACGTC                              |
| hsa_circ_0007556 (APP)      | div-F | GGTGGGCGGTGTTGTCATA                               |
|                             | div-R | GGCATGAGAGCATCGTTTCC                              |
| hsa_circ_0007647 (THAP4)    | div-F | CTGTCCGCCAGCCGC                                   |
|                             | div-R | CGGTCAGGTGGAAGATGGATG                             |
| hsa_circ_0014788 (HDGF)     | div-F | TGCTGACTGTAGCTTTGGAAGT                            |
|                             | div-R | GGCTGTTGATTTACGGCAG                               |
| hsa_circ_0097922 (PGAM5)    | div-F | ATGGCGTGGGGTTTAAGGTG                              |
|                             | div-R | ATCTTGTCCGGAGGCATGAA                              |
| hsa_circ_0000837 (RBBP8)    | div-F | TCCAAGCAGCAGATGAAGAG                              |
|                             | div-R | TCTTGAACACCAAGTCCAAGTG                            |
| hsa_circ_0001355 (RSRC1)    | div-F | GTCGAAGTCGTTCAAGGGT                               |
|                             | div-R | GCTCGAGGAGGACCGTCTA                               |
| hsa_circ_0007761 (ATXN7)    | div-F | AATCTGTGGGTTGAGGC                                 |
|                             | div-R | GCTCCGACATTCTTTCC                                 |
| hsa_circ_0123878 (CDCP1)    | div-F | TGTGACCAAGATGCCCAAAGT                             |
|                             | div-R | GGGTCCCCAGCTTTATGAGAA                             |
| ACTIN                       | F     | CACCATTGGCAATGAGCGGTTT                            |
|                             | R     | AGGTCTTTGCGGATGTCCACGT                            |
| GAPDH                       | F     | GTCTCCTCTGACTTCAACAGCG                            |
|                             | R     | ACCACCCTGTTGCTGTAGCCAA                            |
| hsa_circ_0025202 (GAPDH)    | div-F | TCATTTCTGCAATGCCTCCT                              |
|                             | div-R | ATGATGTTCTGGAGAGCCCC                              |
| ACTIN                       | div-F | GATGTGGATCAGCAAGCAGG                              |
|                             | div-R | TACTTCAGGGTGAGGATGCC                              |
| FOXO3a                      | F     | TCTACGAGTGGATGGTGCGTTG                            |
|                             | R     | CTCTTGCCAGTTCCCTCATTCTG                           |
| miR-182-5p                  | F     | TTTGGAATGGTAGAACTCACACT                           |
| miR-34a-5p                  | F     | TGGCAGTGTCTTAGCTGGTTGT                            |
| miR-556-5p                  | F     | GATGAGCTCATTGTAATATGAG                            |
| miR-490-5p                  | F     | CCATGGATCTCCAGGTGGGT                              |
| miR-197-3p                  | F     | TTCACCACCTTCTCCACCCAGC                            |
| miR-516b-5p                 | F     | ATCTGGAGGTAAGAAGCACTTT                            |
| miR-885-3p                  | F     | AGGCAGCGGGGTGTAGTGGATA                            |
| miR-1271-5p                 | F     | CTTGGCACCTAGCAAGCACTCA                            |
| miR-382-5p                  | F     | GAAGTTGTTTCGTGGTGGATTTCG                          |
| miR-449a                    | F     | TGGCAGTGTATTGTTAGCTGGT                            |
| miR-183-5p                  | F     | TATGGCACTGGTAGAATTCCT                             |

---

|             |   |                          |
|-------------|---|--------------------------|
| miR-34c-5p  | F | AGGCAGTGTAGTTAGCTGATTGC  |
| miR-449b-5p | F | AGGCAGTGTATTGTTAGCTGGC   |
| miR-1225-3p | F | TGAGCCCCTGTGCCGCCCCAG    |
| miR-4306    | F | TGGAGAGAAAGGCAGTA        |
| miR-185-5p  | F | TGGAGAGAAAGGCAGTTCCTGA   |
| miR-940     | F | AAGGCAGGGCCCCCGCTCCCC    |
| miR-1827    | F | TGAGGCAGTAGATTGAAT       |
| miR-215-5p  | F | ATGACCTATGAATTGACAGAC    |
| miR-491     | F | AGTGGGGAACCCTTCCATGAGG   |
| miR-657     | F | GGCAGGTTCTCACCTCTCTAGG   |
| miR-609     | F | AGGGTGTCTCTCATCTCT       |
| miR-520h    | F | ACAAAGTGCTTCCCTTTAGAGT   |
| miR-520g    | F | ACAAAGTGCTTCCCTTTAGAGTGT |
| snRNA U6 F  | F | GCGCGTCGTGAAGCGTTC       |
| snRNA U6 R  | R | GTGCAGGGTCCGAGGT         |

---

#### RNA oligos

|                      |           |                                     |
|----------------------|-----------|-------------------------------------|
| si-circ_0025202-1    | sense     | UCCUGCAAUGCCUCCUGCATT<br>(5'-3')    |
|                      | antisense | UGCAGGAGGCAUUGCAGGATT<br>(5'-3')    |
| si-circ_0025202-2    | sense     | AAGCUCAUUUCCUGCAAUGTT<br>(5'-3')    |
|                      | antisense | CAUUGCAGGAAAUGAGCUUTT<br>(5'-3')    |
| miR-182-5p mimics    | sense     | UUUGGCAAUGGUAGAACUCACACU<br>(5'-3') |
|                      | antisense | UGUGAGUUCGACCAUUGCCAAAUU<br>(5'-3') |
| miR-182-5p inhibitor | sense     | AGUGUGAGUUCUACCAUUGCCAAA<br>(5'-3') |
| si-FOXO3a            | sense     | CAACCUGUCACUGCAUAGU<br>(5'-3')      |
|                      | antisense | ACUAUGCAGUGACAGGUUG<br>(5'-3')      |
| NC-si                | sense     | UUCUCCGAACGUGUCACGUTT<br>(5'-3')    |
|                      | antisense | ACGUGACACGUUCGGAGAATT<br>(5'-3')    |
| NC                   | sense     | CAGUACUUUUGUGUAGUACAA<br>(5'-3')    |

---
